# Supplementary material
Source: publisher figshare collection journal article supplement (https://karger.figshare.com/ndownloader/files/27567980)
Supplement: Supplementary file 1 [file 27567980]

**Supplementary material 2-1: Summary of patients with complete clinical data positive for the single AMPA antibody.**

| **Case** | **Author/Year** | **Gender** | **Age (year)** | **Clinical Symptom** | | | **CSF WBC** | **CSF Protein** | **Other antibodies** | **Tumor** | **Clinical diagnosis of LE** | **Treatment** | **Outcome** |
| --- | --- | --- | --- | --- | --- | --- | --- | --- | --- | --- | --- | --- | --- |
| **Mode of Onset** | **Symptoms of typical LE** | **Other neurologic symptoms** |
| 1 | Lai M et al./2009(1) | F | 64 | Seizure | Yes | No | 75 | 79 | No | Non-SCLC | Yes | Tumor removal; corticosteroids | Returned to baseline |
| 2 | F | 65 | Short term  memory loss | Yes | Transient  downbeat nystagmus | 30 | 97 | No | No | Yes | IVIg,  Corticosteroids,  azathioprine | Improved partially |
| 3 | F | 38 | Short-term memory loss | Yes | No | 6 | Normal | No | No | Yes | IVIg, corticosteroids | Returned to baseline |
| 4 | F | 61 | Short-term memory loss | Yes | No | 24 | 420 | No | Breast cancer | Yes | plasma exchange and  corticosteroids | Returned to baseline; died of  myocardial infarction |
| 5 | F | 67 | Confusion | Yes | No | 32 | Normal | No | Breast cancer | Yes | Tumor removal, radiation therapy,  corticosteroids chemotherapy  (including cyclophosphamide), IVIg | Rapid recovery of memory; mild  persistent depression, apathy and  reduced verbal fluency |
| 6 | Bataller L et al./2010(2) | F | 67 | confusion | Yes | No | 32 | Normal | No | breast ductal infiltrating adenocarcinoma | Yes | IVIg and chemotherapy with Adriamycin and cyclophosphamide | Return to work, but had partial amnesia of  the illness |
| 7 | Graus F et al./2010(3) | F | 60 | progressive confusion | No | No | Normal | Normal | No | malignant thymoma | No | corticosteroids | Complete recovery |
| 8 |  | F | 58 | confusion | No | No | Normal | Normal | No | No | No | neuroleptics and corticosteroids. | Return to baseline |
| 9 | Wei YC et al./2013(4) | F | 30 | behavioral changes | Yes | ataxia, multidirectional nystagmus, quadriparesis, | 70 | 112 | No | No | Yes | corticosteroids,  plasma exchange and azathioprine | Returned to work |
| 10 | Spatola M et al./2014(5) | F | 33 | seizure | Yes | No | 9 | Normal | No | No | Yes | corticosteroids,  plasma exchange,  rituximab | Improved partially |
| 11 | Dogan Onugoren M et al./2015(6) | M | 61 | Memory deficits | Yes | No | <3 | N/A | No | No | Yes | corticosteroids, azathioprine | Improved partially |
| 12 | M | 62 | Memory deficits | Yes | No | 16 | N/A | No | No | Yes | corticosteroids, rituximab, IVIg, PLEX | Fluctuation, no recovery |
| 13 | F | 61 | Memory deficits | Yes | No | 0 | N/A | No | Ovarial adenocarcinoma | Yes | corticosteroids, mycophenolate mofetil, IVIg, PLEX, chemotherapy | Improved partially |
| 14 | Elamin M et al./2015(7) | F | 73 | confusion | No | No | Normal | Normal | No | No | No | IVIg, mycophenolate mofetil | Improved partially |
| 15 | Höftberger R et al./2015(8) | F | 42 | LE | Yes | Mild hemiparesis  left | Normal | Normal | No | Breast cancer | Yes | Tumor resection,  chemotherapy, IVIg | Improved partially |
| 16 | F | 51 | LE | Yes | No | Normal | Normal | No | SCLC | Yes | Chemotherapy,  radiotherapy, corticosteroids | Returned to  work |
| 17 | M | 59 | LE | Yes | No | 6 | 50 | No | SCLC | Yes | Chemotherapy,  radiotherapy, IVIg | Returned to  work |
| 18 | M | 62 | LE | Yes | Hemiparesis,  mutism | Normal | Normal | No | Malignant thymoma | Yes | Tumor resection, corticosteroids,  IVIg | Returned to  work |
| 19 | F | 70 | LE | Yes | No | Normal | 64 | No | SCLC | Yes | Chemotherapy, radiotherapy, corticosteroids | Improved partially |
| 20 | F | 33 | LE | Yes | No | 14 | Normal | No | No | Yes | corticosteroids, plasma exchange,  rituximab, cyclophosphamide | No recovery |
| 21 | M | 35 | LE | Yes | No | 23 | N/A | No | No | Yes | corticosteroids, IVIg, rituximab | Improved partially |
| 22 | F | 64 | LE | Yes | No | 5 | Normal | No | No | Yes | corticosteroids, IVIg, plasma  exchange | Improved partially |
| 23 | F | 72 | LE | Yes | Spasticity | 50 | 49 | No | No | Yes | corticosteroids, IVIg | Improved partially |
| 24 | F | 72 | LE | Yes | No | 52 | 100 | No | No | Yes | corticosteroids | Improved partially |
| 25 | M | 23 | Short-term memory | No | decerebrate  posturing right arm | 23 | Normal | No | Thymoma | No | Tumor resection, IVIg,  corticosteroids, rituximab | Improved partially |
| 26 | F | 65 | Short-term memory  loss | No | No | Normal | 71 | No | Breast cancer | No | Tumor resection,  chemotherapy, radiotherapy,  corticosteroids, IVIg, plasma  exchange | Improved partially |
| 27 | M | 69 | Seizures | No | weakness,  ataxia | Normal | Normal | No | No | No | IVIg, plasma exchange | Improved partially |
| 28 | F | 29 | Left-sided weakness | No | Autonomic instability | 13 | Normal | No | Ovarian teratoma | No | Tumor resection; corticosteroids,  IVIg, plasma exchange,  rituximab | No recovery |
| 29 | F | 38 | Psychosis with bipolar  features | No | Nystagmus | 90 | N/A | No | No | No | N/A | Improved partially |
| 30 | Li X et al./2015(9) | F | 47 | progressive apathy | No | deceased  verbal fluency and repetition | Normal | Normal | No | thymoma | No | Tumor resection; corticosteroids, sazathioprine | Improved partially |
| 31 | Joubert B et al./2015(10) | F | 56 | anterograde amnesia | Yes | right upper limb cerebellar dysmetria, vertical nystagmus and  opsoclonus | 220 | Normal | No | No | Yes | corticosteroids,  IVIg, rituximab | Improved partially |
| 32 | M | 21 | Memory loss | No | diffuse hypertonia and ocular deviation | 28 | 70 | No | No | No | corticosteroids and IVIg | Returned to work |
| 33 | F | 92 | amnesia | No | No | 4 | Normal | No | No | No | IVIg | Returned to baseline. |
| 34 | Quaranta G et al./2015(11) | F | 20 | resistant  continuous rapid cycles bipolar disorder | No | Turner’s syndrome | N/A | N/A | No | No | No | mood stabilisers and memantine | Improved partially |
| 35 | Laurido-Soto O et al./2018(12) | M | 18 | Performance decline | No | No | 197 | 25 | No | No | No | IVIg, rituximab | Returned to work |
| 36 | Omi T et al./2018(13) | F | 34 | Confusion | No | No | Normal | Normal | No | Thymoma | No | Tumor resection; corticosteroids | Returned to work |
| 37 | Zaeem Z et al./2020(14) | F | 39 | Seizure | Yes | No | N/A | 25.5 | No | No | Yes | Corticosteroids, plasma exchange and rituximab | Improved partially and stable |

M: male; F: female; CSF: cerebrospinal fluid; LE: limbic encephalitis; N/A: not applicable; IVIg: intravenous immunoglobulin; SCLC: small cell lung cancer; non-SCLC: non-small cell lung cancer;

Symptoms of typical LE, characterized by an acute or subacute onset, the presence of short-term memory loss, confusion, abnormal behavior, psychiatric features and sometimes seizures. The clinical diagnosis of LE was confirmed by the MRI findings of high-tensity signal abnormalities and sometimes cortex edema of unilateral or bilateral mesiotemporal on FLAIR/T2 sequences.

**Reference**

[1]Lai M, Hughes EG, Peng X, et al. AMPA receptor antibodies in limbic encephalitis alter synaptic receptor location. Ann Neurol 2009 65:424-434. doi:10.1002/ana.21589

[2]Bataller L, Galiano R, García-Escrig M, et al. Reversible paraneoplastic limbic encephalitis associated with antibodies to the AMPA receptor. Neurology 2010 74:265-267. doi:10.1212/WNL.0b013e3181cb3e52

[3]Graus F, Boronat A, Xifró X, et al. The expanding clinical profile of anti-AMPA receptor encephalitis. Neurology 2010 74:857-859. doi:10.1212/WNL.0b013e3181d3e404

[4]Wei YC, Liu CH, Lin JJ, et al. Rapid progression and brain atrophy in anti-AMPA receptor encephalitis. J Neuroimmunol 2013 261:129-133. doi:10.1016/j.jneuroim.2013.05.011

[5]Spatola M, Stojanova V, Prior JO, et al. Serial brain ¹⁸FDG-PET in anti-AMPA receptor limbic encephalitis. J Neuroimmuno. 2014 271:53-55. doi:10.1016/j.jneuroim.2014.04.002

[6]Dogan Onugoren M, Deuretzbacher D, Haensch CA, et al. Limbic encephalitis due to GABAB and AMPA receptor antibodies: a case series. J Neurol Neurosurg Psychiatry 2015 86:965-972. doi:10.1136/jnnp-2014-308814

[7]Elamin M, Lonergan R, Killeen RP, et al. Posterior cortical and white matter changes on MRI in anti-AMPA receptor antibody encephalitis. Neurol Neuroimmunol Neuroinflamm 2015 2:e118. Published 2015 May 21. doi:10.1212/NXI.0000000000000118

[8]Höftberger R, van Sonderen A, Leypoldt F, et al. Encephalitis and AMPA receptor antibodies: Novel findings in a case series of 22 patients. Neurology. 2015 84:2403-2412. doi:10.1212/WNL.0000000000001682

[9]Li X, Mao YT, Wu JJ, et al. Anti-AMPA receptor encephalitis associated with thymomatous myasthenia gravis. J Neuroimmunol 2015 281:35-37. doi:10.1016/j.jneuroim.2015.02.011

[10]Joubert B, Kerschen P, Zekeridou A, et al. Clinical Spectrum of Encephalitis Associated With Antibodies Against the α-Amino-3-Hydroxy-5-Methyl-4-Isoxazolepropionic Acid Receptor: Case Series and Review of the Literature. JAMA Neurol. 2015 72:1163-1169. doi:10.1001/jamaneurol.2015.1715

[11]Quaranta G, Maremmani AG, Perugi G. Anti-AMPA-Receptor Encephalitis Presenting as a Rapid-Cycling Bipolar Disorder in a Young Woman with Turner Syndrome. Case Rep Psychiatry. 2015:273192. doi:10.1155/2015/273192

[12]Laurido-Soto O, Brier MR, Simon LE, et al. Patient characteristics and outcome associations in AMPA receptor encephalitis. J Neurol 2019 266:450-460. doi:10.1007/s00415-018-9153-8

[13]Omi T, Kinoshita M, Nishikawa A, et al. Clinical Relapse of Anti-AMPAR Encephalitis Associated with Recurrence of Thymoma. Intern Med. 2018 57:1011-1013. doi:10.2169/internalmedicine.9682-17

[14]Zaeem Z, Luk CC, Anderson D, et al. AMPA-R Limbic Encephalitis Associated with Systemic Lupus Erythematosus [published online ahead of print, 2020 Apr 13]. Can J Neurol Sci 2020 1-2. doi:10.1017/cjn.2020.70

**Supplementary material 2-2: Summary of patients with complete clinical data positive for more than one types of antibody.**

| **Case** | **Author/Year** | **Gender** | **Age (year)** | **Clinical Symptom** | | | **CSF WBC** | **CSF Protein** | **Other antibodies** | **Tumor** | **Clinical diagnosis of LE** | **Treatment** | **Outcome** |
| --- | --- | --- | --- | --- | --- | --- | --- | --- | --- | --- | --- | --- | --- |
| **Mode of Onset** | **Symptoms of typical LE** | **Other neurologic symptoms** |
| 1 | Lai M et al./2009(1) | M | 38 | short-term  memory loss | Yes | No | 7 | 50 | GAD65 | Malignant thymoma | Yes | Tumor removal, radiation therapy;  corticosteroids, plasma exchange, IVIg. | Improved partially; Mild residual memory deficit |
| 2 | F | 44 | Short term  memory loss; | Yes | right beating nystagmus | 44 | 91 | ANA, dsDNA, | Thymic  carcinoma | Yes | Tumor removal, IVIg, corticosteroids;  chronic treatment with  azathioprine | Improved partially; Residual  short-term memory deficit |
| 3 | F | 87 | short-term  memory loss | Yes | No | Normal | 50 | ANA | No | Yes | Corticosteroids | Died |
| 4 | F | 59 | Progressive memory loss | Yes | mild  dysdiadochokinesia | 17 | 51 | ANA; VGCC  and SOX1 | SCLC | Yes | Tumor removal,  chemotherapy;  corticosteroids, IVIg | Returned to baseline; died of  myocardial infarction |
| 5 | F | 44 | Confusion | Yes | Mild gait  unsteadiness, low grade fever. | 15 | Normal | CV2/CRMP5 | Thymoma | Yes | No | Improved partially; Unexpected dead, cardiorespiratory  arrest |
| 6 | Höftberger R et al./2015(2) | F | 63 | LE | Yes | No | Normal | 425 | GABA(B)R;  SOX1 | SCLC | Yes | Chemotherapy,  radiotherapy | Improved partially |
| 7 | F | 81 | LE | Yes | No | Normal | Normal | SOX1 | SCLC | Yes | Chemotherapy,corticosteroids | No recovery |
| 8 | F | 25 | Psychosis | No | No | Normal | Normal | NMDAR | Ovarian teratoma | No | Tumor resection, corticosteroids,  IVIg | Returned to  work |
| 9 | F | 53 | Confusion | No | No | 164 | 92 | CRMP5 | Malignant thymoma | No | Tumor resection,  chemotherapy, radiotherapy,  corticosteroids, IVIg | No recovery |
| 10 | M | 71 | Somnolent | No | No | Normal | N/A | NMDAR | Thymic carcinoid | No | Tumor resection, corticosteroids,  plasma exchange | Returned to  work |
| 11 | M | 72 | Short-term memory  loss, | No | Sensory  polyneuropathy | Normal | 65 | Amphi | Lung tumor | No | corticosteroids | No recovery |
| 12 | M | 62 | Short-term memory  loss, | No | ataxia | 33 | 173 | CRMP5 | No | No | corticosteroids, rituximab | No recovery |
| 13 | Joubert B et al./2015(3) | M | 58 | confusion | Yes | mild aphasia | Normal | Normal | ANA | No | Yes | corticosteroids,  IVIg, cyclophosphamide | Improved partially |
| 14 | M | 74 | disorientation | Yes | hemi-body polymodal sensory deficits, right hemiparesis | 38 | 56 | Hu | Suspected lung cancer | Yes | chemotherapy (carboplatin and VP16), IVIg,  plasma exchange, | Improved partially |
| 15 | F | 43 | paresthesia | Yes | tachycardia, mild cerebellar signs | Normal | Normal | LGI1 and GAD65 | thymus hyperplasia | Yes | corticosteroids,  IVIg | Returned to work |
| 16 | F | 22 | memory deficits | Yes | Insomnia, movement disorders (hemidystonia, myoclonus,  oculogyric crisis) and down-beat nystagmus. | 29 | Normal | ANA | No | Yes | corticosteroids, IVIg, cyclophosphamide, plasma exchanges and rituximab. | Died |
| 17 | Boangher S et al./2016(4) | F | 66 | confusion,  short-term memory loss | Yes | No | 18 | Normal | NMDAR | Small-Cell Lung Cancer | Yes | corticosteroids,  plasma exchange, Cyclophosphamide and Rituximab | Improved partially |
| 18 | Yang S et al./ 2016(5) | M | 40 | Dementia | Yes | numbness  and weakness in left limbs,  involuntary movements,  autonomic dysfunction | 52 | 63.2 | CRMP5 | Suspected  malignant  thymoma | Yes | IVIg | Died |
| 19 | Zhu M et al/2017(6) | F | 54 | Short-term memory  loss | Yes | No | 63 | 50 | TPO | No | Yes | corticosteroids,  IVIg | Improved partially |
| 20 | Laurido-Soto O/2018(7) | M | 44 | Disorientation | Yes | dystonia | N/A | N/A | CRMP5 | thymoma | Yes | corticosteroids,  IVIg, rituximab | Returned to work |
| 21 | Jia Y et al./2019(8) | M | 26 | insomnia | Yes | involuntary movements,  ataxia, autonomic  dysfunction | 52 | 37.7 | CRMP5 | Suspected  lymphoma | Yes | corticosteroids, IVIg | Died |

M: male; F: female; CSF: cerebrospinal fluid; LE: limbic encephalitis; N/A: not applicable; IVIg: intravenous immunoglobulin; SCLC: small cell lung cancer; non-SCLC: non-small cell lung cancer;

Symptoms of typical LE, characterized by an acute or subacute onset, the presence of short-term memory loss, confusion, abnormal behavior, psychiatric features and sometimes seizures. The clinical diagnosis of LE was confirmed by the MRI findings of high-tensity signal abnormalities and sometimes cortex edema of unilateral or bilateral mesiotemporal on FLAIR/T2 sequences.

**Reference**

[1]Lai M, Hughes EG, Peng X, et al. AMPA receptor antibodies in limbic encephalitis alter synaptic receptor location. Ann Neurol 2009 65:424-434. doi:10.1002/ana.21589

[2]Höftberger R, van Sonderen A, Leypoldt F, et al. Encephalitis and AMPA receptor antibodies: Novel findings in a case series of 22 patients. Neurology 2015 84:2403-2412. doi:10.1212/WNL.0000000000001682

[3]Joubert B, Kerschen P, Zekeridou A, et al. Clinical Spectrum of Encephalitis Associated With Antibodies Against the α-Amino-3-Hydroxy-5-Methyl-4-Isoxazolepropionic Acid Receptor: Case Series and Review of the Literature. JAMA Neurol 2015 72:1163-1169. doi:10.1001/jamaneurol.2015.1715

[4]Boangher S, Mespouille P, Filip CM, Goffette S. Small-Cell Lung Cancer with Positive Anti-NMDAR and Anti-AMPAR Antibodies Paraneoplastic Limbic Encephalitis. Case Rep Neurol Med 2016 2016:3263718. doi:10.1155/2016/3263718

[5]Yang S, Qin J, Li J, et al. Rapidly progressive neurological deterioration in anti-AMPA receptor encephalitis with additional CRMP5 antibodies. Neurol Sci 2016 37:1853-1855. doi:10.1007/s10072-016-2680-0

[6]Zhu M, Yu X, Liu C, et al. Hashimoto's encephalitis associated with AMPAR2 antibodies: a case report. BMC Neurol 2017 17(1):37. Published 2017 Feb 21. doi:10.1186/s12883-017-0823-4

[7]Laurido-Soto O, Brier MR, Simon LE, et al. Patient characteristics and outcome associations in AMPA receptor encephalitis. J Neurol 2019 266:450-460. doi:10.1007/s00415-018-9153-8

[8]Jia Y, Wang J, Xue L, et al. Limbic encephalitis associated with AMPA receptor and CRMP5 antibodies: A case report and literature review. Brain Behav 2020 10:e01528. doi:10.1002/brb3.1528
